# Supplementary material for: Oxygen-functionalized TlTe buckled honeycomb from first-principles study
Source: Royal Society of Chemistry journal article supplement (doi:10.1039/c8cp07246a), 2019-01-01
Supplement: c8cp07246a1.pdf [file c8cp07246a1.pdf]

## **Supplementary Material: Oxygen functionalized TTe buckled honeycomb from first-principles study**

Qing Lu <sup>1</sup>, Yi-Ming Wen <sup>1</sup>, Zhao-Yi Zeng <sup>2,\*</sup>, Xiang-Rong Chen <sup>1,\*</sup>, Qi-Feng Chen <sup>3</sup>

<sup>1</sup> Institute of Atomic and Molecular Physics, College of Physical Science and Technology, Sichuan  
University, Chengdu 610064, China;

<sup>2</sup> College of Physics and Electronic Engineering, Chongqing Normal University, Chongqing 400047,  
China;

<sup>3</sup> National Key Laboratory for Shock Wave and Detonation Physics Research, Institute of Fluid Physics,  
Chinese Academy of Engineering Physics, Mianyang 621900, China

---

\* Corresponding authors. E-mail: [zhaoyizeng@126.com](mailto:zhaoyizeng@126.com); [xrchen@scu.edu.cn](mailto:xrchen@scu.edu.cn)

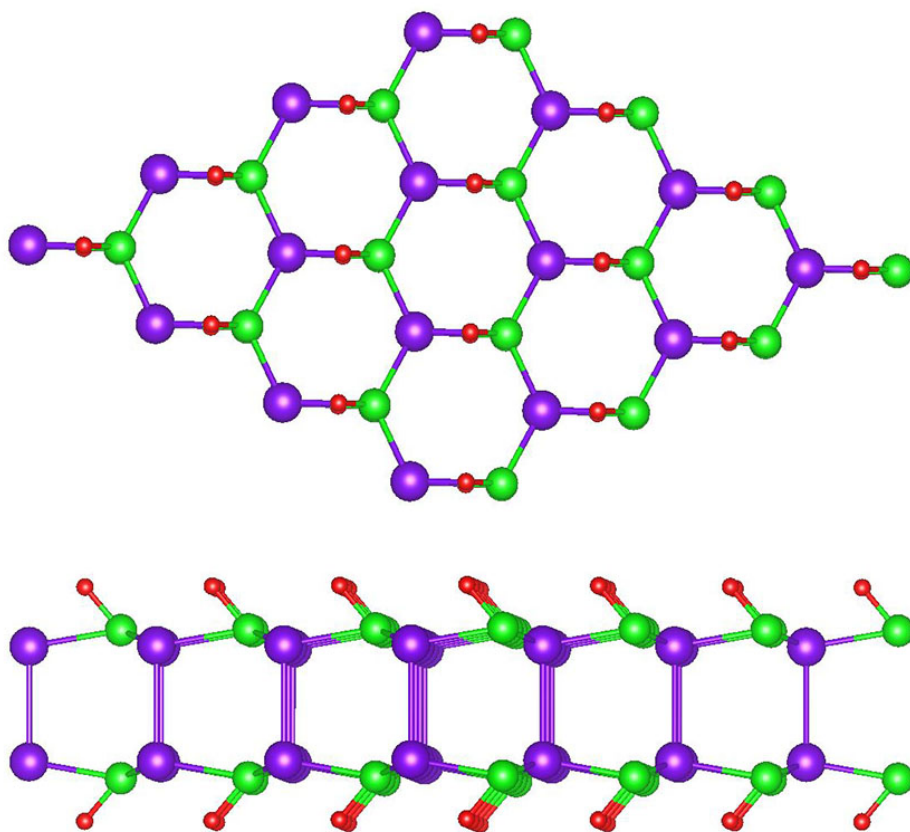

**Fig. S1.** Snapshots of atomic configuration at 2 ps for TlTeO at the end of MD simulation.

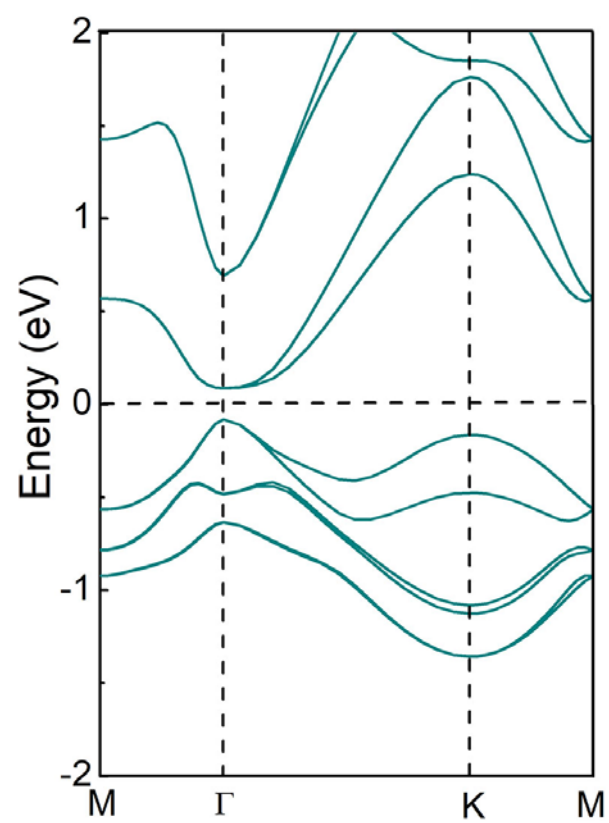

**Fig. S2.** The band structure of TlTeO by HSE06 with SOC.
